# Supplementary material
Source: HighWire-hosted journal article supplement (https://erj.ersjournals.com/content/56/1/1902178)
Supplement: inline-supplementary-material-1 [file inline-supplementary-material-1.pdf]

## Si Materials and methods

### Solution composition

HBSS: composition in mM: 5.3 KCl, 0.44  $\text{KH}_2\text{PO}_4$ , 137.9 NaCl, 0.336  $\text{Na}_2\text{PO}_4$ , 2.33  $\text{CaCl}_2$ , 0.79  $\text{MgSO}_4$ , 10 glucose, 10 HEPES buffer, pH adjusted to 7.4 with NaOH)

Krebs: (composition in mM: 110 NaCl, 0.82  $\text{MgSO}_4$ , 1.2  $\text{KH}_2\text{PO}_4$ , 3.4 KCl, 25.7  $\text{NaHCO}_3$ , 2.4mM  $\text{CaCl}_2$ , and 5.6 glucose, pH at 7.4, bubbled with 95/5%  $\text{O}_2/\text{CO}_2$  gas mixture)

$\text{Ca}^{2+}$  free Krebs, as normal Krebs without  $\text{CaCl}_2$

### Preparation, transport, and dissection

Lungs were recovered within 2 h after disconnection from the ventilator. Whole lung blood vessels were flushed with histidine-tryptophan-ketoglutarate (HTK) or University of Wisconsin (UW) solution after which the lungs were shipped in HTK or UW solution and arrived at our facility within 24 h of cross-clamp time.

Airway trees were dissected free from the parenchyma, taking care to minimize stress on the airways. Airway segments between the 3<sup>rd</sup> and 5<sup>th</sup> branching generations (2-6mm internal diameter) were dissected out. Segments were placed under a dissection microscope in  $\text{Ca}^{2+}$  free Krebs solution on ice for further dissection. Airway segments were cut open longitudinally, pinned down and epithelium was removed by stripping or cutting. ASM strips were carefully lifted out of the airway by cutting through the connective tissue layer. Muscle tissue strips were subsequently cleaned from any visible remaining connective tissue and aluminum foil clips were attached on either end of the tissue. ASM area of these dissected tissue strips, as determined from cross-sectional histology slides, averaged  $0.0665 \pm 0.0123\text{mm}^2$ .

### Rejection criteria

As the availability of human lungs is unpredictable and certain measures were rejected because of technical difficulties, the actual sample size varied. To reduce variability, we tested two intrapulmonary and two trachealis tissues for each lung. Tissues that did not contract in response to EFS or MCh, or tissues that showed a >10% reduction in contractile force with repeated contractions, were rejected. Some tissues could not be tested for all protocols because of equipment malfunction, or because of post-hoc determined flaws in control parameter settings (inability to achieve a force control without overshoot). For details see Table S1.

### Equilibration

Tissues were subsequently equilibrated using electrical field stimulations (EFS, 25 V/cm at 50Hz, 2ms pulse width for 10s) every 5min for 30min or until the resulting contractile force stabilized. This was followed by at least 5 contractions with MCh  $10^{-5}$  M or  $10^{-6}$  M MCh until a stable baseline and contractile force was achieved.  $10^{-6}$  M MCh was used in earlier experiments where only trachealis muscle was tested, while  $10^{-5}$  M MCh was found to be required for more recent experiments in which intrapulmonary muscle was also tested, as these tissues did not equilibrate well with  $10^{-6}$  M MCh.

## Dose response

Tissues were exposed to increasing concentrations of MCh from  $10^{-8}$  M to  $10^{-4}$  M every 100s (Fig. S1A). The peak force reached before each subsequent dose was taken as the force representative of that dose. To calculate stress, the force values were divided by the ASM cross-sectional area which was calculated as follows. Tissues were pinned down at  $L_{ref}$  on silicone strips and placed in 10% formalin for >24h, and fixed upright in paraffin to allow for cross-sectional cuts for histological analysis. 5 $\mu$ m thick slices were stained with alpha actin or Masson's Trichrome staining, each providing good contrast between ASM and non-muscle tissue. The ASM cross-section was traced and the area calculated. Both maximal stress and  $EC_{50}$ , the dose at which 50% of contractile stress was achieved, were calculated by fitting the data with a sigmoidal dose response curve.

After the tissue was exposed to the last MCh dose, it was exposed every 100s to increasing concentrations of isoproterenol ( $10^{-8}$  to  $10^{-4}$ M) to measure its ability to relax (Fig. S1A). The minimum force achieved during each 100s interval was taken as the force representative of that dose. Both maximal relaxation and  $EC_{50}$ , the dose at which 50% of relaxation was achieved, were calculated by fitting the data with a sigmoidal dose response curve.

## Shortening velocity

Shortening velocity measurements were performed at multiple time points to indirectly assess potential differences in cross-bridge cycling rates and their development during a contraction. Tissues were first shortened briefly by 25% of  $L_{ref}$  after which the reference zero force was measured ( $F_{zero}$ ) to compensate for force drift in the force transducer. Subsequently the tissues were contracted with EFS for 5, 8 or 10s, immediately followed by a rapid 120ms force clamp (Fig. S1B, inset) to a force of 5, 7, 10, 20, 40 or 80% of the force just prior to the force clamp relative to  $F_{zero}$ , for a total of 21 individual EFS contractions. The slope of the length signal between 80 and 120ms of the force clamp duration was taken as the shortening velocity at this force clamp (Fig. S1B, inset). Force velocity plots were generated using these shortening velocity data and the post-hoc measured actual force clamp value between 80 and 120 ms. Force-Velocity curves were calculated by performing a perpendicular least squares fitting method of the classic hill curve ( $V=b(F_0-F)/(a+F)$ ) (1).

## Viscoelastic properties

To probe the viscoelastic properties of the muscle, a continuous 30Hz, 0.5%  $L_{ref}$  peak-to-peak length oscillation was applied to the tissue while it was contracted for 5 min with  $10^{-5}$  M MCh (Fig. S1C). The normalized stiffness was calculated from the peak-to-peak change in stress ( $\Delta\sigma$ ) divided by the strain, or fractional length change. Hysteresivity, a dimensionless quantity that expresses hysteresis as a fraction of the elastic potential energy during an oscillation, was calculated as in (2). In short, when applied to sinusoidal oscillations,  $\eta$  can be calculated as  $\eta = \tan(\sin^{-1}(4A/\pi\Delta F\Delta L))$ , with A the area of the force-length loop,  $\Delta F$  the peak-to-peak force amplitude and  $\Delta L$  the peak-to-peak length amplitude.

## Mass Spectrometry

Ultra-high Liquid Chromatography tandem Mass Spectrometry (uHPLC-MS/MS) was used with the following parameters: After running a single SDS PAGE stacking gel band containing all proteins for each sample, the gel band was reduced, alkylated and digested using trypsin (mass spec sequencing grade, ProMega). Peptides were loaded onto a Thermo Acclaim Pepmap (Thermo, 75 $\mu$ M ID X 2cm C18 3 $\mu$ M beads) precolumn and then onto an Acclaim Pepmap Easyspray analytical column (Thermo, 75 $\mu$ M X

15cm with 2uM C18 beads) separation using a Dionex Ultimate 3000 uHPLC at 220 nl/min with a gradient of 2-35% organic (0.1% formic acid in acetonitrile) over 3 h. Peptides were analyzed using a Thermo Orbitrap Fusion mass spectrometer operating at 120,000 resolution (FWHM in MS1, 15,000 for MS/MS) with HCD sequencing all peptides with a charge of 2+ or greater. The raw data were converted into \*.mgf format (Mascot generic format) and searched using Mascot 2.6.2 against Uniprot human sequences. The database search results were loaded onto Scaffold Q+ Scaffold\_4.8.9 (Proteome Sciences) for spectral counting. Proteins with an average exclusive peptide count across subjects below 2 were excluded. To isolate differences in the smooth muscle of the whole airway samples, each protein was checked against its prevalence in smooth muscle and non smooth muscle tissues of the airways (cartilage tissue, epithelium, adipocytes, fibroblasts and pneumocytes) as listed in The Protein Atlas (3). Only those proteins which were listed as “not detected” in the non smooth muscle cells and tissues, or were listed as “low” in non smooth muscle tissues and “high” in smooth muscle tissues, were used. To correct for smooth muscle content differences between subjects, we calculated the relative total exclusive spectrum counts (i.e. the mean per protein normalized to 1) for each smooth muscle protein and normalized these by the sum of all the relative spectrum counts of smooth muscle proteins.

## Supplementary Figures and Tables

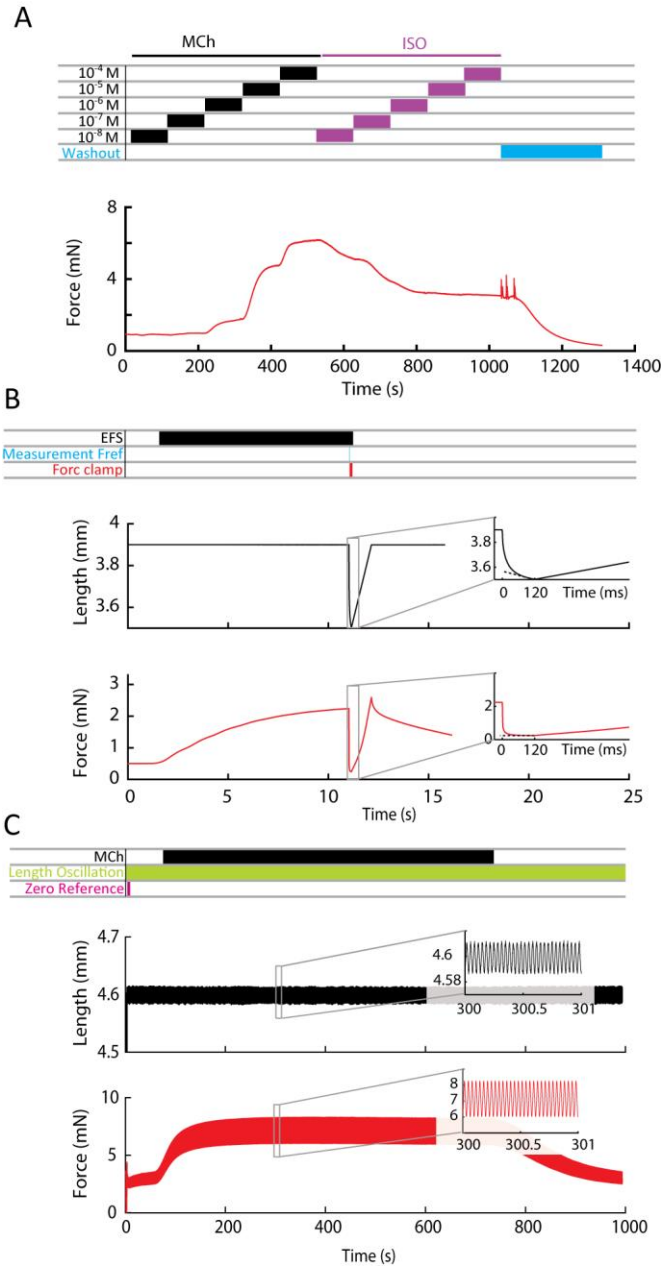

**Figure S1:** Traces of airway smooth muscle (ASM) mechanics experiments. (A) Sample trace of methacholine (MCh) and isoproterenol (Iso) dose responses. (B) Sample trace of a single EFS force clamp protocol. Top inset shows detail of length during a force clamp, with the slope of the dashed line indicating the shortening velocity. Bottom inset shows detail of force during a force clamp, with force maintained at 5% of the reference force ( $F_{ref}$ ) for 120ms. (C) Sample trace of length and force oscillations for stiffness and hysteresivity estimation. Insets show detail of length (top) and force (bottom) oscillations.

**Table S1:** Definition of Abbreviations: A=African American; W=White; H=Hispanic; CVA=Cerebrovascular Accident; HT=Head Trauma; ICH=Intracerebral Hemorrhage; SIGSW=Self Inflicted Gunshot Wound; YA=Years Ago; P.Y.=Per Year. Mechanics Data indicate which experiments were performed on tissue from subject: T=Trachea ASM, IB=Intrapulmonary bronchi ASM, MCh=Methacholine Dose response, Iso=Isoproterenol Dose Response, EFS10=EFS force velocity at 10s, EFS5, 8, 10= EFS force velocity at 5, 8 and 10s, Prot=Proteomics data. \*=maximum stress was determined.

| Subj.                     | Sex | Age | BMI | Ethn. | Cause of Death                | Asthma history                                           | Other                                                                  | Medication(s)                            | Medication in hospital                                    | Data                                     |
|---------------------------|-----|-----|-----|-------|-------------------------------|----------------------------------------------------------|------------------------------------------------------------------------|------------------------------------------|-----------------------------------------------------------|------------------------------------------|
| <b>Asthmatic patients</b> |     |     |     |       |                               |                                                          |                                                                        |                                          |                                                           |                                          |
| 1                         | M   | 72  | 44  | W     | CVA                           | Age of diagnosis unknown                                 | Smoking 16 P.Y., quit 50 Y.A.                                          |                                          |                                                           | MCh-T*; EFS10-T                          |
| 2                         | F   | 34  | 32  | W     | Anoxia from drug intoxication | Diagnosed 20 Y.A., hospitalised twice with exacerbations |                                                                        | Inhaler-Prednisone                       | Methylprednisolone; Norepinephrine;                       | MCh-T*                                   |
| 3                         | M   | 29  | 31  | W     | Anoxia cardiovascular event   | Diagnosed 7 years ago                                    | Chewing tobacco for 1 year                                             | Albuterol-Inhaler                        | Esmolol; Norepinephrine                                   | MCh-T*; EFS10-T                          |
| 4                         | M   | 35  | 29  | W     | Anoxia, cardiovascular event  | Asthma since childhood.                                  |                                                                        | Albuterol, Budesonide                    | Norepinephrine; Methylprednisolone; Albuterol             | MCh-T*; EFS10-T-IB                       |
| 5                         | M   | 40  | 27  | A     | Anoxia, cardiovascular event  | Asthma Diagnosed 5 Y.A.                                  |                                                                        | Mometasone and formoterol                | Norepinephrine; Methylprednisolone                        | MCh-T; EFS10-T                           |
| 6                         | F   | 38  | 36  | W     | Anoxia cardiovascular event   | Asthma diagnosed at 8                                    |                                                                        | Montelukast                              | Norepinephrine; Epinephrine; Dopamine;                    | MCh-T-IB; EFS10-T-IB                     |
| 7                         | M   | 23  | 17  | H     | CVA                           | Asthma, unknown when diagnosed                           | Smoking 7 P.Y. Oxycodone-paracetamol abuse, marijuana & cocaine 1 year | Albuterol                                | Phenylephrine; Methylprednisolone                         | MCh-T-IB*; EFS5810-T-IB; Prot            |
| 8                         | F   | 53  | 20  | W     | CVA                           | Asthma, unknown when diagnosed                           | Seizure 15 Y.A. , illicit drug use (non IV) 25 Y.A.                    | Albuterol                                | Norepinephrine; Epinephrine; Dopamine; Methylprednisolone | MCh-T*-IB*; Iso-T-IB; EFS5810-T-IB; Prot |
| 9                         | M   | 23  | 24  | A     | Anoxia (Asthma)               | Asthma diagnosed age 10, seasonal allergies              | Smoking 6 P.Y.                                                         | Asthma inhaler (unspecified)             | Methylprednisolone, Albuterol                             | MCh-T*-IB*; Iso-T-IB; EFS5810-T-IB; Prot |
| 10                        | F   | 41  | 24  | H     | CVA                           | Asthma, unknown when diagnosed                           | Hypothyroidism                                                         | Asthma medication unknown                | Phenylephrine, Vasopressin, Epinephrine, Norepinephrine   | MCh-T*-IB*; Iso-T-IB, EFS5810-IB; Prot   |
| 11                        | M   | 27  | 26  | H     | Anoxia, cardiovascular event  | Asthma, unknown when diagnosed                           |                                                                        | Steroid                                  | Norepinephrine, Methylprednisolone, Albuterol             | MCh-T*-IB*; Iso-T-IB; EFS5810-T-IB; Prot |
| 12                        | F   | 52  | 33  | A     | Anoxia, cardiovascular event  | History of asthma, resolved but recently                 | Multiple allergies, diabetes,                                          | Metformin, HTN medications, hemodialysis | Lorezapam; norepinephrine, furosemide;                    | Prot                                     |

|  |  |  |  |  |  |                                          |                                                                      |  |          |  |
|--|--|--|--|--|--|------------------------------------------|----------------------------------------------------------------------|--|----------|--|
|  |  |  |  |  |  | return of<br>symptoms after<br>pneumonia | hypertension,<br>congenital<br>heart disease<br>and heart<br>failure |  | mannitol |  |
|--|--|--|--|--|--|------------------------------------------|----------------------------------------------------------------------|--|----------|--|

**Control subjects**

|    |   |    |    |   |                                           |                                                           |                                                                     |                                   |                                                                                                |                                                          |
|----|---|----|----|---|-------------------------------------------|-----------------------------------------------------------|---------------------------------------------------------------------|-----------------------------------|------------------------------------------------------------------------------------------------|----------------------------------------------------------|
| 12 | M | 22 | 23 | W | Head Trauma<br>2nd to SIGSW               | Asthma as child,<br>not taken<br>medication in 7<br>years | Smoked<br>Hookah past<br>year                                       | Albuterol as child                | Norepinephrine;<br>Phenylephrine;<br>Ipratropium<br>bromide; Albuterol;<br>Methylprednisolone; | MCh-T                                                    |
| 13 | M | 47 | 26 | W | CVA                                       |                                                           |                                                                     |                                   | Phenylephrine                                                                                  | MCh-T*;<br>EFS10-T                                       |
| 14 | F | 35 | 22 | W | Anoxia from<br>intracranial<br>hemorrhage |                                                           | Remote<br>marijuana use                                             |                                   | Norepinephrine;                                                                                | MCh-T*;<br>EFS10-T                                       |
| 15 | M | 30 | 22 | W | Anoxia from<br>Asphyxiation               |                                                           | Smoking: 10<br>P.Y., Marijuana,<br>Cocaine                          |                                   | Methylprednisolone                                                                             | MCh-T-<br>IB; EFS10-<br>T-IB; Prot                       |
| 16 | F | 54 | 36 | W | CVA                                       |                                                           | Smoking: 10<br>P.Y., Quit 8 Y.A.                                    |                                   | Epinephrine;                                                                                   | MCh T;<br>EFS10-T                                        |
| 17 | F | 62 | 31 | W | CVA                                       |                                                           | Hypertension,<br>Basal cell<br>carcinoma in<br>nose 3 Y.A.          |                                   | Dopamine                                                                                       | MCh-T*;<br>EFS10-T                                       |
| 18 | M | 55 | 27 | W | Head trauma                               |                                                           | Marijuana<br>occasionally,<br>alcohol abuse                         |                                   | Phenylephrine;<br>Methylprednisolone                                                           | MCh-T*<br>-IB*;<br>EFS10-T-<br>IB                        |
| 19 | M | 31 | 24 | W | Anoxia,<br>electrocution                  |                                                           | Smoking, quit<br>10 Y.A.                                            |                                   | Esmolol, Albuterol                                                                             | MCh-IB;<br>EFS10-IB;<br>Prot                             |
| 20 | F | 58 | 34 | W | CVA                                       |                                                           |                                                                     |                                   | Phenylephrine;<br>Methylprednisolone                                                           | EFS10-T                                                  |
| 21 | F | 54 | 25 | W | Head trauma                               |                                                           | Smoking 30<br>P.Y., quit 16<br>Y.A.;<br>Hypertension                |                                   | Norepinephrine;<br>Albuterol                                                                   | MCh-T*;<br>EFS10-T                                       |
| 22 | M | 49 | 25 | W | HT 2nd GSW                                |                                                           | Alcoholism                                                          |                                   |                                                                                                | MCh-T*<br>-IB*;<br>EFS5810-<br>T-IB                      |
| 23 | M | 28 | 22 | W | Anoxia 2nd<br>Asphyxiation                |                                                           | Smoking 5 P.Y.,<br>Marijuana                                        |                                   | Norepinephrine                                                                                 | EFS5810-<br>T-IB                                         |
| 24 | F | 33 | 27 | A | Anoxia 2nd<br>Drug<br>Intoxication        |                                                           | Bipolar-<br>Depression,<br>Smoking 5 P.Y.<br>Methadone              | Depression<br>medication          | Norepinephrine,<br>Methylprednisolone                                                          | MCh-T*<br>-IB*;<br>Iso-<br>T-IB,<br>EFS5810-<br>T-IB     |
| 25 | M | 38 | 31 | W | Head trauma                               |                                                           |                                                                     |                                   | Methylprednisolone                                                                             | MCh-T*<br>-IB*;<br>Iso-<br>T-IB;<br>EFS5810-<br>T-IB     |
| 26 | F | 63 | 27 | W | CVA                                       |                                                           | Hyperlipidemia,<br>osteopenia                                       | Zacor,<br>methotrexate,<br>Bovina | N/A                                                                                            | MCh-T*<br>-IB*;<br>Iso-T;<br>EFS5810-<br>T-IB            |
| 27 | F | 53 | 33 | W | CVA                                       |                                                           | Hypertension,<br>anti-<br>phospholipid<br>syndrome,<br>multiple CVA | N/A                               | Norepinephrine                                                                                 | MCh-T*<br>-IB*;<br>Iso-<br>T-IB;<br>EFS5810-<br>IB; Prot |

|    |   |    |    |   |                                    |  |                                                            |                                                                                                                                                                                |                                                                                                            |                                                         |
|----|---|----|----|---|------------------------------------|--|------------------------------------------------------------|--------------------------------------------------------------------------------------------------------------------------------------------------------------------------------|------------------------------------------------------------------------------------------------------------|---------------------------------------------------------|
| 28 | M | 18 | 37 | W | Anoxia,<br>cardiovascular<br>event |  | Autism,<br>Penicillin<br>Allergy                           | Fluoxetine,<br>Alprazolam,<br>Lisdexamphetamine,<br>Depakote, lithium,<br>Guanfacine,<br>Topiramate,<br>Buspirone, N-Acetyl<br>Cysteine, Prilosec,<br>Clozapine,<br>Clonazepam | Epinephrine,<br>Norepinephrine                                                                             | MCh-T*-<br>IB*; Iso-<br>T-IB;<br>EFS5810-<br>T-IB; Prot |
| 29 | M | 55 | 24 | A | CVA                                |  | Diabetes, HTN,<br>smoking 40 P.Y.,<br>Alcohol 2 per<br>day | Metformin                                                                                                                                                                      | Methylprednisolone,<br>Epinephrine,<br>Norepinephrine,<br>Heparin, Mannitol,<br>Furosemide,<br>Vasopressin | Prot                                                    |
| 30 | M | 37 | 37 | C | Anoxia,<br>electrocution           |  |                                                            | none                                                                                                                                                                           | N/A                                                                                                        | Prot                                                    |

Table S2: Smooth muscle specific proteins

|         |                                                   |
|---------|---------------------------------------------------|
| ZYX     | Zyxin                                             |
| PECAM1  | Platelet endothelial cell adhesion molecule       |
| SLMAP   | Sarcolemmal membrane-associated protein           |
| MYL12A  | Myosin regulatory light chain 12A                 |
| PTX3    | Pentraxin-related protein PTX3                    |
| TINAGL1 | Tubulointerstitial nephritis antigen-like         |
| SMTN    | Smoothelin                                        |
| VCAN    | Versican core protein                             |
| SYNPO2  | Synaptopodin-2                                    |
| ACTC1   | Actin, alpha cardiac muscle 1                     |
| ITGB1   | Integrin beta-1                                   |
| LAMA4   | Laminin subunit alpha-4                           |
| TPM1    | Tropomyosin alpha-1 chain                         |
| CNN1    | Calponin-1                                        |
| PALLD   | Palladin                                          |
| MYLK    | Myosin light chain kinase, smooth muscle          |
| PGM5    | Phosphoglucomutase-like protein 5                 |
| TAGLN   | Transgelin                                        |
| DES     | Desmin                                            |
| ACTA2   | Actin, aortic smooth muscle                       |
| MYH11   | Myosin-11o                                        |
| AEBP1   | Adipocyte enhancer-binding protein 1              |
| SRPRB   | Signal recognition particle receptor subunit beta |
| THBS1   | Thrombospondin-1                                  |
| CALD1   | Caldesmon                                         |
| ACTB    | Actin, cytoplasmic 1                              |
| FLNA    | Filamin-A                                         |



Table S3: Significantly altered proteins in total airway extract

|         |                                                                             |
|---------|-----------------------------------------------------------------------------|
| KANK2   | KN motif and ankyrin repeat domain-containing protein 2                     |
| SYNM    | Synemin                                                                     |
| SORBS1  | Sorbin and SH3 domain-containing protein 1                                  |
| SMTN    | Smoothelin                                                                  |
| LPP     | Lipoma-preferred partner                                                    |
| MCAM    | Cell surface glycoprotein MUC18                                             |
| FLNC    | Filamin-C                                                                   |
| BASP1   | Brain acid soluble protein 1                                                |
| GPX3    | Glutathione peroxidase 3                                                    |
| COL4A2  | Collagen alpha-2(IV) chain                                                  |
| SYNPO2  | Synaptopodin-2                                                              |
| PGM5    | Phosphoglucomutase-like protein 5                                           |
| PALLD   | Palladin                                                                    |
| POSTN   | Periostin                                                                   |
| NID1    | Nidogen-1                                                                   |
| MYL9    | Myosin regulatory light polypeptide 9                                       |
| NDUFA9  | NADH dehydrogenase [ubiquinone] 1 alpha subcomplex subunit 9, mitochondrial |
| FERMT2  | Fermitin family homolog 2                                                   |
| CORO1C  | Coronin-1C                                                                  |
| SUN2    | SUN domain-containing protein 2                                             |
| MYH11   | Myosin-11o                                                                  |
| MYLK    | Myosin light chain kinase, smooth muscle                                    |
| CYC1    | Cytochrome c1, heme protein, mitochondrial                                  |
| ITGB1   | Integrin beta-1                                                             |
| CRIP2   | Cysteine-rich protein 2                                                     |
| EMILIN1 | EMILIN-1                                                                    |
| CALD1   | Caldesmon                                                                   |
| PFKL    | ATP-dependent 6-phosphofructokinase, liver type                             |
| CAVIN3  | Caveolae-associated protein 3                                               |
| DES     | Desmin                                                                      |
| CSRP1   | Cysteine and glycine-rich protein 1                                         |
| PGM2    | Phosphoglucomutase-2                                                        |
| ATP2B4  | Plasma membrane calcium-transporting ATPase 4                               |
| LGALS3  | Galectin-3                                                                  |
| ILK     | Integrin-linked protein kinase                                              |
| LAMA5   | Laminin subunit alpha-5                                                     |
| LAMB2   | Laminin subunit beta-2                                                      |
| TNS1    | Tensin-1                                                                    |
| FLNA    | Filamin-A                                                                   |
| RAB10   | Ras-related protein Rab-10                                                  |
| DSTN    | Destrin                                                                     |
| HSPG2   | Basement membrane-specific heparan sulfate proteoglycan core protein        |
| CLIC4   | Chloride intracellular channel protein 4                                    |
| CHCHD3  | MICOS complex subunit MIC19                                                 |
| RSU1    | Ras suppressor protein 1                                                    |
| VCL     | Vinculin                                                                    |
| AOC3    | Membrane primary amine oxidase                                              |
| AIFM1   | Apoptosis-inducing factor 1, mitochondrial                                  |
| TLN1    | Talin-1                                                                     |

|          |                                                                                                                  |
|----------|------------------------------------------------------------------------------------------------------------------|
| CAVIN1   | Caveolae-associated protein 1                                                                                    |
| H1FO     | Histone H1.0                                                                                                     |
| RAP1B    | Ras-related protein Rap-1b                                                                                       |
| WDR1     | WD repeat-containing protein 1                                                                                   |
| EHD2     | EH domain-containing protein 2                                                                                   |
| CAND1    | Cullin-associated NEDD8-dissociated protein 1                                                                    |
| ACTA2    | Actin, aortic smooth muscle                                                                                      |
| MYO1C    | Unconventional myosin-Ic                                                                                         |
| DPYSL3   | Dihydropyrimidinase-related protein 3                                                                            |
| RPS27A   | Ubiquitin-40S ribosomal protein S27a                                                                             |
| SRI      | Sorcin                                                                                                           |
| H2AFY    | Core histone macro-H2A.1                                                                                         |
| SERPINB6 | Serpin B6                                                                                                        |
| DLD      | Dihydrolipoyl dehydrogenase, mitochondrial                                                                       |
| UQCRC2   | Cytochrome b-c1 complex subunit 2, mitochondrial                                                                 |
| DLST     | Dihydrolipoyllysine-residue succinyltransferase component of 2-oxoglutarate dehydrogenase complex, mitochondrial |
| HMGB1    | High mobility group protein B1                                                                                   |

**Table S4:** Database for Annotation, Visualization and Integrated Discovery (DAVID) gene ontology cell component enrichment.

| Gene Ontology Term                            | Count | Bonferroni |
|-----------------------------------------------|-------|------------|
| GO:0005856 cytoskeleton                       | 26    | 1.61E-04   |
| → GO:000015629 actin cytoskeleton             | 17    | 7.59E-05   |
| GO:0030054 cell junction                      | 10    | 0.015271   |
| → GO:0070161 anchoring junction               | 10    | 0.001082   |
| → GO:0005912 adherens junction                | 10    | 0.001082   |
| → GO:0005924 cell-substrate adherens junction | 9     | 6.60E-04   |
| → GO:0005925 focal adhesion                   | 8     | 0.005607   |
| → GO:0030055 cell-substrate junction          | 9     | 9.97E-04   |
| → GO:0005924 cell-substrate adherens junction | 9     | 6.60E-04   |
| → GO:0005925 focal adhesion                   | 8     | 0.005607   |
| GO:0043292 contractile fiber                  | 10    | 0.005995   |
| → GO:0044449 contractile fiber part           | 10    | 0.004638   |
| GO:0016323 basolateral plasma membrane        | 10    | 0.009736   |

Count column shows the number of proteins that were enriched within this term, out of 66 proteins that were enriched in subjects with asthma. The Bonferroni column shows the Bonferroni corrected p-value of the enrichment. Grey lines indicate duplicate gene ontology terms that appear in multiple hierarchies.

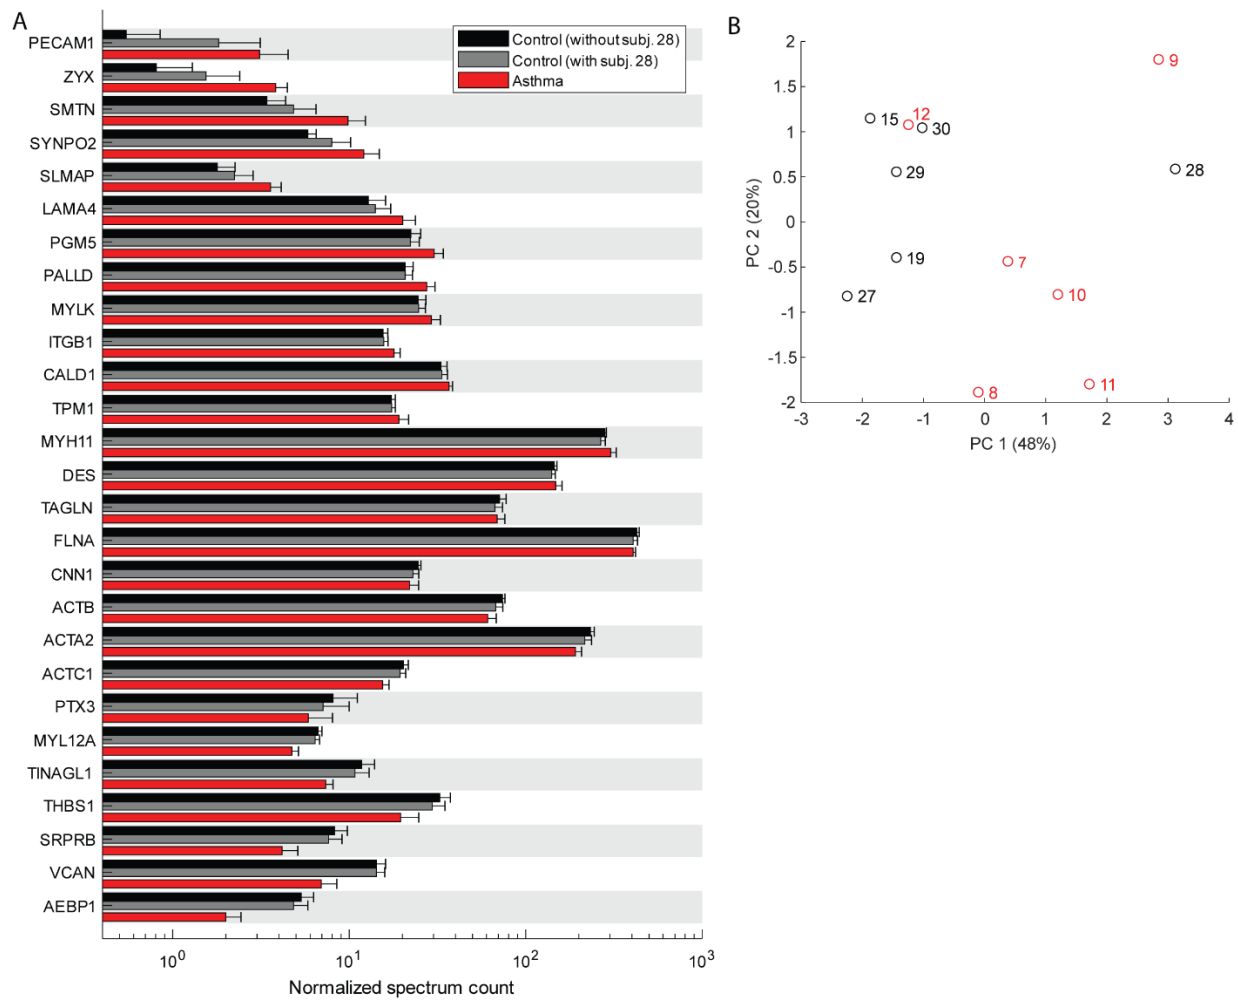

Figure S2 Proteomics data from airway smooth muscle (ASM) specific proteins. (A) Normalized spectrum counts for all smooth muscle specific proteins with a minimum average spectrum count of 2. Black bars are all control subjects excluding clinical outlier subject 28. Grey bars are all control subjects. Red bars are all subjects with asthma. (B) PCA for smooth muscle specific proteins. Black circles are control (subject numbers between brackets) and red circles are asthmatics.

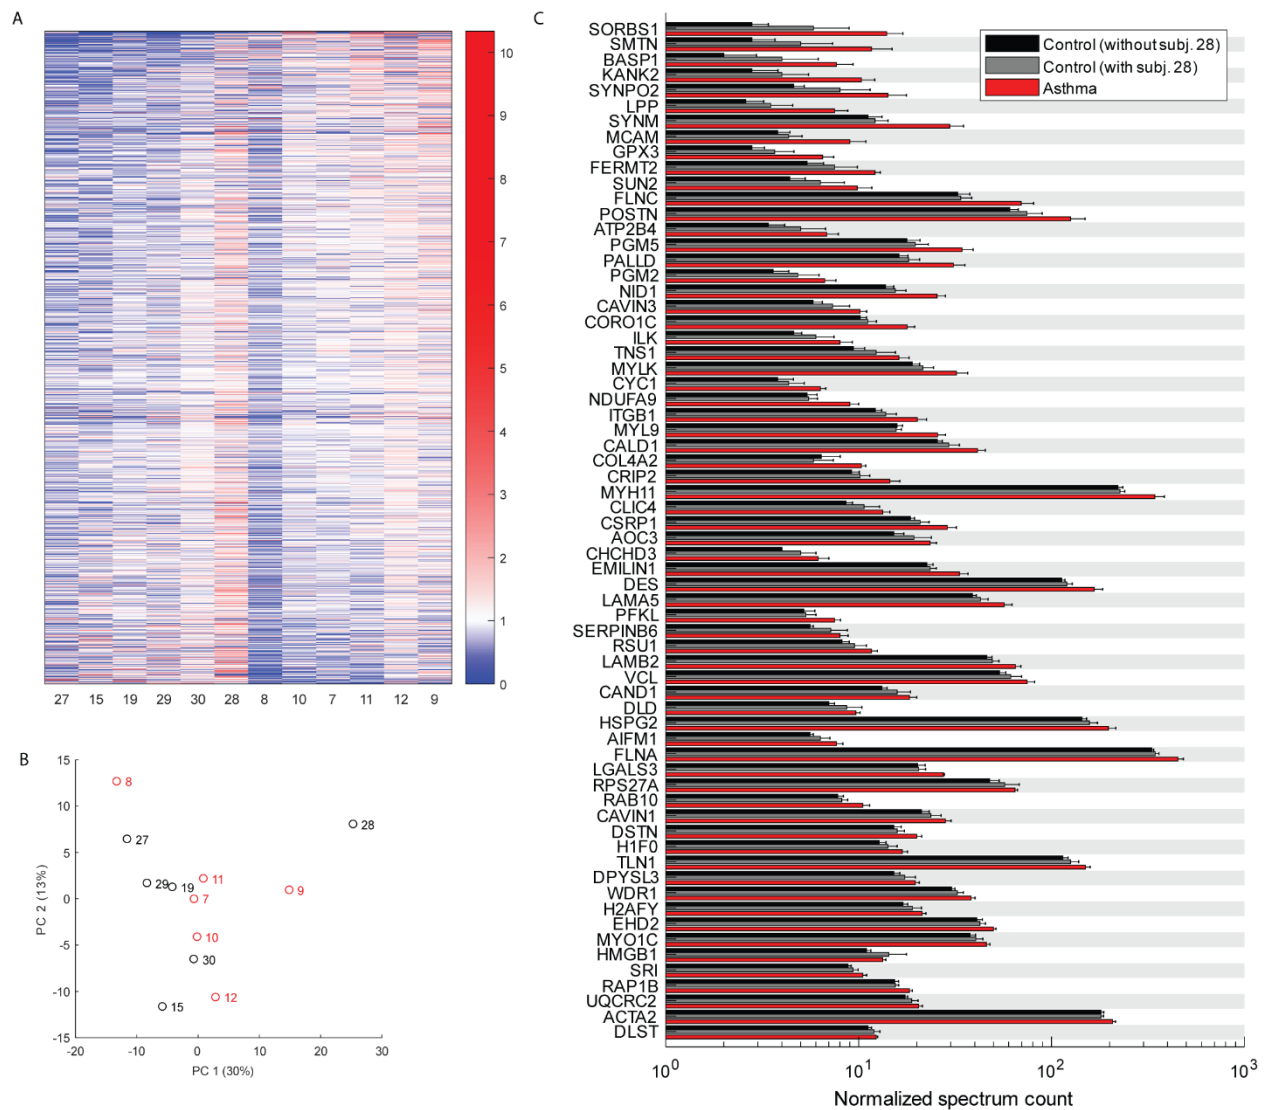

Figure S3: Proteomics data for whole airway extracts. (A) Heatmap of all proteins detected. Subject numbers as in Table 1 (B) PCA for all proteins and all subjects. Black circles are control (subject numbers between brackets) and red circles are asthmatics. (C) Normalized spectrum counts for the 66 proteins that are significantly different in subjects with asthma ( $p < 0.05$  without correction for multiple comparison). Black bars are all control subjects excluding clinical outlier subject 28. Grey bars are all control subjects. Red bars are all subjects with asthma.

## References

1. Bullimore SR, Saunders TJ, Herzog W, & MacIntosh BR (2010) Calculation of muscle maximal shortening velocity by extrapolation of the force–velocity relationship: afterloaded versus isotonic release contractions. *Can. J. Physiol. Pharmacol.* 88(10):937-948.
2. Fredberg JJ, *et al.* (1997) Airway smooth muscle, tidal stretches, and dynamically determined contractile states. *Am J Respir Crit Care Med* 156(6):1752-1759.
3. Uhlén M, *et al.* (2015) Tissue-based map of the human proteome. *Science* 347(6220):1260419.
4. Ammit AJ, Armour CL, & Black JL (2000) Smooth-Muscle Myosin Light-Chain Kinase Content Is Increased in Human Sensitized Airways. *Am J Respir Crit Care Med* 161(1):257-263.
5. Walsh MP, *et al.* (2011) Rho-associated kinase plays a role in rabbit urethral smooth muscle contraction, but not via enhanced myosin light chain phosphorylation. *American Journal of Physiology-Renal Physiology* 300(1):F73-F85.
